# Supplementary material for: A drug–drug interaction study to assess the potential effect of acid-reducing agent, lansoprazole, on quizartinib pharmacokinetics
Source: Springer Nature journal article supplement (doi:10.1007/s00280-019-03915-1), 2019-08-05

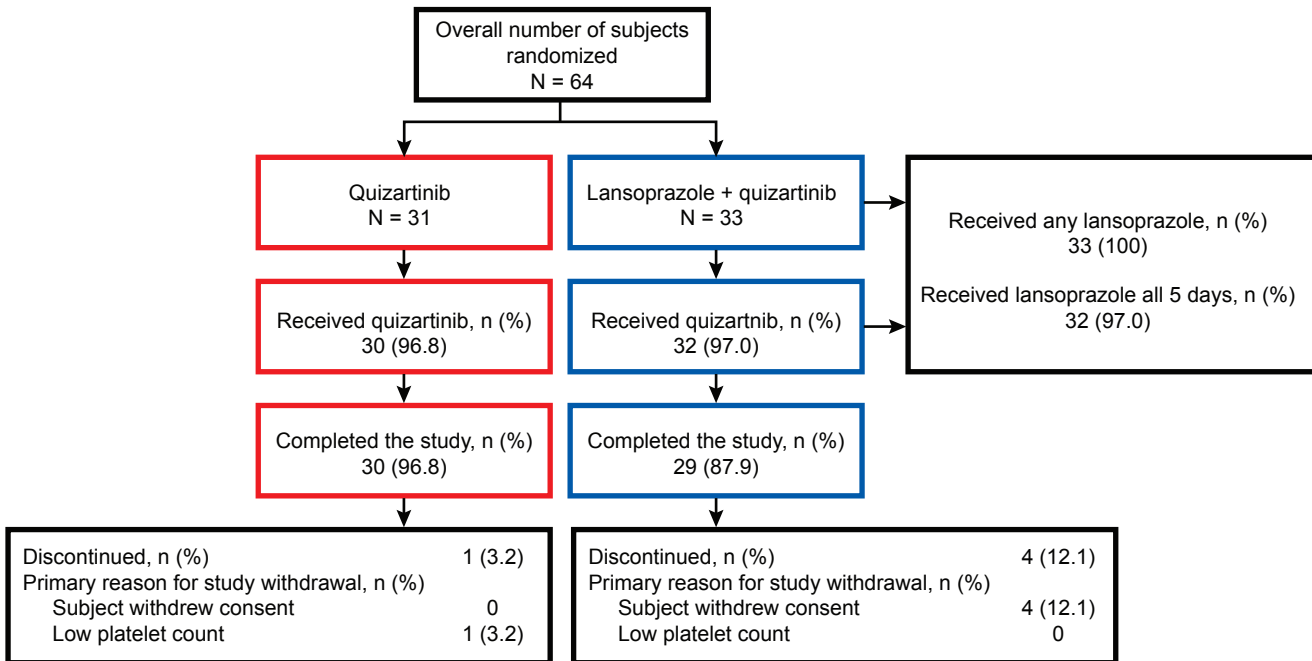

Supplement: MOESM2 [file 17039122]
